# Supplementary material
Source: MDPI journal article supplement (https://www.mdpi.com/2311-5637/10/5/255)
Supplement: s1 [file s1]

## Supporting Information

# Enhanced oxygen mass transfer in mixing bioreactor using silica microparticles

**Matheus M. Pereira <sup>1</sup>, Ivus Lorenzo Oliveira Matos <sup>2</sup>, Filipe Moreira Mascarenhas Cordeiro <sup>3</sup>, Ana Cristina Moraes da Silva <sup>3</sup>, Eliane Bezerra Cavalcanti <sup>2,4</sup> and Álvaro Silva Lima <sup>3,\*</sup>**

<sup>1</sup> University of Coimbra, CERES, Department of Chemical Engineering, Rua SálvioLima, Pólo Ii – Pinhal de Marrocos, 3030-790, Coimbra, Portugal; matheus@eq.uc.pt

<sup>2</sup> Post-Graduated Program on Process Engineering, Tiradentes University, Avenica Murilo Dantas, 300, Farolândia, 49032-490Aracaju-SE, Brazil; ivus.lorenzo@hotmail.com (I.L.O.M.); ebcavalcanti@gmail.com (E.B.C.)

<sup>3</sup> Post-Graduated Program on Chemical Engineering, Federal University of Bahia, Rua Aristides Novis, Federação, 40210-910, Salvador-Bahia, Brazil; filipemoreira1@hotmail.com (F.M.M.C.); acristinasilva@ufba.br (A.C.M..S.)

<sup>4</sup> Instituti de Tecnologia e Pesquisa, Avenica Murilo Dantas, 300, Prédio do ITPFarolândia, 49032-490Aracaju-SE, Brazil

\* Correspondence: aslima2001@yahoo.com.br

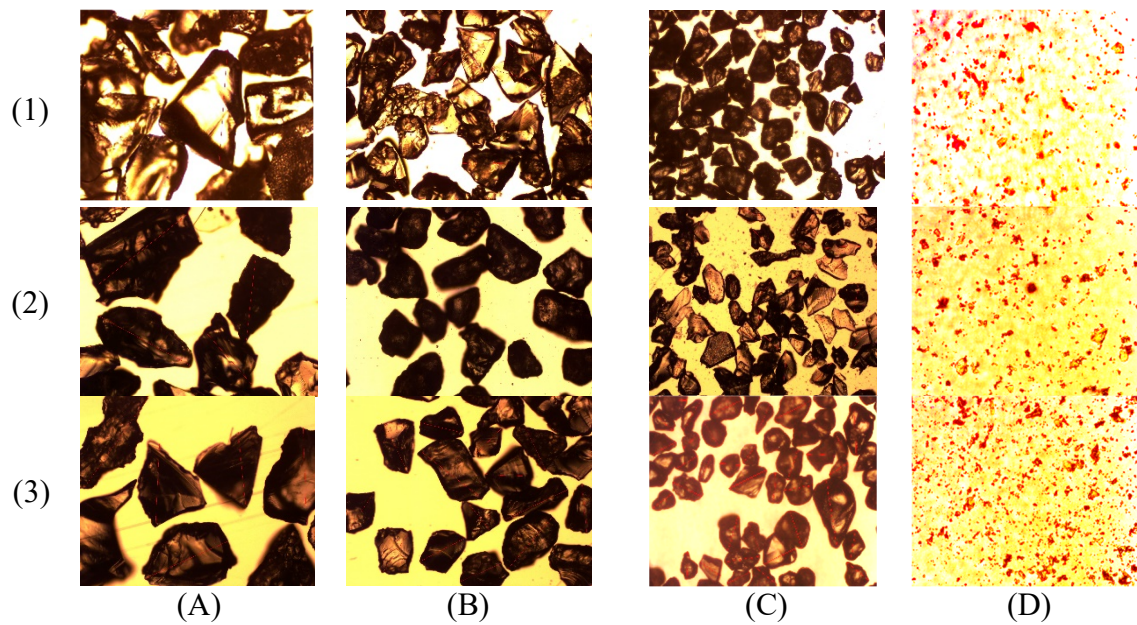

**Figure S1.** Microscopy image of sol-gel silica (1), commercial sand (2) and treated beach sand (3). (A) 350 $\mu\text{m}$ , (B) 150 $\mu\text{m}$ , (C) 75 $\mu\text{m}$  e (D) 10 $\mu\text{m}$

**Table S1.** X-ray diffraction analysis of silica microparticles

| Samples                  | Displacement (2 $\theta$ ) | Scale Factor | Score | Chemical Formule                                                                  | Name            |
|--------------------------|----------------------------|--------------|-------|-----------------------------------------------------------------------------------|-----------------|
| Commercial silica        | 0.001                      | 0.805        | 74    | SiO <sub>2</sub>                                                                  | Silicon dioxide |
| Sol-gel silica           | 0.057                      | 1.048        | 87    | SiO <sub>2</sub>                                                                  | Silicon dioxide |
| Pre-treatment beach sand | 0.180                      | 0.006        | 13    | CaCO <sub>3</sub>                                                                 | Calcite         |
|                          | 0.119                      | 0.002        | 18    | NaCl                                                                              | Halite          |
|                          | 0.061                      | 0.793        | 70    | SiO <sub>2</sub>                                                                  | Silicon dioxide |
|                          | 0.038                      | 0.021        | 7     | Mg <sub>2</sub> Al <sub>4</sub> Si <sub>5</sub> O <sub>18</sub>                   | Cordierite      |
|                          | -0.025                     | 0.003        | 10    | Na <sub>8</sub> Mg <sub>3</sub> Si <sub>9</sub> O <sub>24</sub> (OH) <sub>2</sub> | Sodalite        |
|                          | -0.370                     | 0.008        | 9     | CaF <sub>2</sub>                                                                  | Fluorite        |
|                          |                            |              |       |                                                                                   |                 |
| Pos-treatment beach sand | 0.057                      | 1.048        | 87    | SiO <sub>2</sub>                                                                  | Silicon dioxide |

**Table S2.** Influence of agitation on the oxygen mass transfer ( $k_{La}$ ) using aeration of  $1.5 \text{ L min}^{-1}$  at  $25^{\circ}\text{C}$ .

| Agitation (rpm) | $K_{La}$ ( $\text{h}^{-1}$ ) |
|-----------------|------------------------------|
| 50              | 4.15                         |
| 100             | 8.32                         |
| 150             | 12.0                         |
| 200             | 14.91                        |

**Table S3.** Influence of agitation on the oxygen mass transfer ( $k_{La}$ ) using aeration of  $1.5 \text{ L min}^{-1}$  at  $25^{\circ}\text{C}$ .

| Aeration ( $\text{L min}^{-1}$ ) | $K_{La}$ ( $\text{h}^{-1}$ ) |
|----------------------------------|------------------------------|
| 0.5                              | 3.96                         |
| 1.5                              | 8.32                         |
| 3.0                              | 11.22                        |
| 4.5                              | 13.41                        |
| 6.0                              | 14.44                        |

**Table S4.** Effect of particle size ( $1 \text{ g L}^{-1}$ ) on the oxygen mass transfer ( $k_{La}$ ) using an agitation of  $100 \text{ rpm}$  aeration of  $3.0 \text{ L min}^{-1}$  and at  $25^{\circ}\text{C}$ .

| Particle Size( $\mu\text{m}$ ) | Silica sol-Gel | Commercial sand | Sand beach treated |
|--------------------------------|----------------|-----------------|--------------------|
| 0 (without)                    | 11.21          | 11.21           | 11.21              |
| 10                             | 12.80          | 21.68           | 13.66              |
| 75                             | 27.02          | 21.95           | 19.35              |
| 150                            | 18.75          | 19.29           | 16.63              |
| 350                            | 16.26          | 16.69           | 15.64              |

**Table S5.** Effect of particle concentration with  $75 \mu\text{m}$  on the oxygen mass transfer ( $k_{La}$ ) using an agitation of  $100 \text{ rpm}$  aeration of  $3.0 \text{ L min}^{-1}$  and at  $25^{\circ}\text{C}$ .

| Particle Concentration ( $\mu\text{m}$ ) | Silica sol-Gel | Commercial sand | Sand beach treated |
|------------------------------------------|----------------|-----------------|--------------------|
| 0.00                                     | 11.21          | 11.21           | 11.21              |
| 0.05                                     | 11.52          | 13.95           | 11.64              |
| 0.15                                     | 11.71          | 15.21           | 11.83              |
| 0.25                                     | 12.80          | 16.55           | 13.66              |
| 0.50                                     | 12.92          | 16.32           | 14.89              |
| 1.00                                     | 27.02          | 16.55           | 16.31              |
| 2.00                                     | 17.54          | 21.95           | 19.35              |
| 2.50                                     | 13.27          | 15.69           | 12.35              |
| 5.00                                     | 5.79           | 9.06            | 9.89               |
